# Supplementary material for: The Meso-Expression Test (MET): A Novel Assessment of Emotion Perception
Source: MDPI journal article supplement (doi:10.3390/jintelligence11070145), 2023-07-19
Supplement: s1 [file s1]

## Supplemental Material

### Item-level confusion and distractor methodology and results

We selected distractors at the item level based on the confusions of related emotion labels in Study 1 which we present in Table S1. That is, distractors selection emphasized the specific expression in the stimuli, and therefore distractors between items were varied. We also, emphasized selecting distractors that were ‘plausible’ in that they were confused with the target emotion.

To construct items, we paired each stimulus in table S1 with the correct answer, at least one partially correct answer that was frequently confused with the target emotion and may have shared characteristics with the target emotion. Finally, we chose plausible incorrect distractors which were confused at least some of the time with the target emotion and may share some features with that emotion. We note that we used this procedure as a heuristic to guide our decision making on identifying distractors and choosing which answers should receive credit.

For example, item 1 in the non-verbal MET is based on an amusement stimulus (Table S1). As can be seen in the table, this stimulus was recognized above chance as amusement ( $pi=.96$ ). However, it was also frequently confused with Joy ( $pi=.87$ ). Notably, Joy shares similar valence and arousal with amusement and facial features such as corrugator muscle activation (i.e., smiling; Cordaro et al., 2020). Additionally, the labels content ( $pi=.38$ ), relief ( $pi=.33$ ), pride ( $pi=.27$ ) and surprise ( $pi=.27$ ) were also frequent confusions (but less so than Joy) and did not necessarily share the same arousal of amusement (content and relief are low arousal and surprise is very high arousal and ambiguous valence). Consistent with the findings above, we considered Amusement to be the correct answer, Joy to be a partially correct distractor, and content, relief, pride, and surprise to be plausible incorrect distractors (i.e., they were selected at least some of the time) for which we did not give credit. This procedure was repeated for each item.

For the nonverbal and verbal MET sub-tests, we coded polytomous responses in the Graded Response Model (GRM) as (2) Correct answer, (1) partially correct distractor, or (0) incorrect distractor. For the concealed MET sub-test, we coded items polytomous in the GRM as (3) correct answer [i.e., correctly labeling the concealed and expressed emotions], (2) partially correct answer but labels were flipped [i.e., labeled the concealed emotion as the expressed emotion and vice versa], (1) partially correct answer but only identifying one emotion label correctly [i.e., either the labeled or expressed emotion was correct, and the second label was an incorrect wildcard distractor], (0) incorrect distractors selected for both concealed and expressed emotions. All item codings are listed in table S-2.

In Table S2, we show the item level results from Study 2. Across items we replicate results from study 1 and find that correct emotion labels were all selected above chance. Additionally, we find that partially correct distractors were selected frequently and, in most cases, more so than the plausible incorrect distractors as expected.

**Table S1 Study 1 Item-level Confusion Matrix and Selected Distractors**

| Item # | Type   | Amu  | Ang  | Anx  | Awe  | Bor  | Cmp  | Con  | Dis  | Emb  | Fea  | Joy  | Neu  | Pri  | Rel  | Sad  | Sha  | Sup  | Sym  | Selected Distractors                               | Partially correct distractor | Incorrect distractor                     |
|--------|--------|------|------|------|------|------|------|------|------|------|------|------|------|------|------|------|------|------|------|----------------------------------------------------|------------------------------|------------------------------------------|
| 1      | NV AMU | 0.96 | 0.00 | 0.00 | 0.19 | 0.00 | 0.11 | 0.38 | 0.00 | 0.00 | 0.00 | 0.87 | 0.11 | 0.27 | 0.33 | 0.00 | 0.00 | 0.27 | 0.11 | Joy, Content, Relief, Pride, Surprise              | Joy                          | Content, Relief, Pride, Surprise         |
| 2      | NV AMU | 0.97 | 0.00 | 0.23 | 0.13 | 0.00 | 0.37 | 0.37 | 0.00 | 0.31 | 0.00 | 0.73 | 0.31 | 0.43 | 0.13 | 0.00 | 0.23 | 0.31 | 0.00 | Joy, Pride, Content, Contempt, Surprise            | Joy                          | Content, Contempt, Surprise              |
| 3      | NV AMU | 0.95 | 0.00 | 0.14 | 0.32 | 0.00 | 0.45 | 0.50 | 0.39 | 0.24 | 0.00 | 0.71 | 0.39 | 0.32 | 0.50 | 0.14 | 0.14 | 0.24 | 0.00 | Joy, Content, Relief, Contempt, Awe                | Joy                          | Content, Relief, Contempt, Awe           |
| 4      | NV AMU | 0.96 | 0.00 | 0.11 | 0.00 | 0.00 | 0.11 | 0.28 | 0.00 | 0.20 | 0.00 | 0.86 | 0.28 | 0.11 | 0.48 | 0.11 | 0.00 | 0.34 | 0.11 | Joy, Relief, Content, Surprise, Embarrassment      | Joy                          | Relief, Content, Surprise, Embarrassment |
| 5      | NV AMU | 0.97 | 0.00 | 0.00 | 0.12 | 0.00 | 0.12 | 0.45 | 0.12 | 0.21 | 0.00 | 0.82 | 0.28 | 0.21 | 0.28 | 0.00 | 0.00 | 0.00 | 0.00 | Joy, Content, Relief, Pride, Embarrassment         | Joy                          | Content, Relief, Pride, Embarrassment    |
| 6      | NV AMU | 0.96 | 0.00 | 0.00 | 0.00 | 0.00 | 0.13 | 0.37 | 0.00 | 0.13 | 0.13 | 0.88 | 0.22 | 0.13 | 0.43 | 0.00 | 0.00 | 0.30 | 0.00 | Joy, Relief, Content, Surprise, Fear               | Joy                          | Relief, Content, Surprise, Fear          |
| 7      | NV BOR | 0.00 | 0.14 | 0.25 | 0.00 | 0.94 | 0.25 | 0.14 | 0.51 | 0.00 | 0.00 | 0.00 | 0.88 | 0.00 | 0.00 | 0.55 | 0.33 | 0.14 | 0.14 | Sadness, Disgust, Shame, Anxiety, Contempt         | Sadness, Disgust             | Shame, Anxiety, Contempt                 |
| 8      | NV BOR | 0.28 | 0.21 | 0.45 | 0.11 | 0.95 | 0.65 | 0.40 | 0.45 | 0.55 | 0.00 | 0.11 | 0.52 | 0.21 | 0.11 | 0.00 | 0.28 | 0.00 | 0.11 | Contempt, Embarrassment, Disgust, Anxiety, Content | Contempt, Embarrassment      | Disgust, Anxiety, Content                |
| 9      | NV BOR | 0.00 | 0.12 | 0.60 | 0.12 | 0.88 | 0.47 | 0.12 | 0.30 | 0.12 | 0.22 | 0.12 | 0.55 | 0.12 | 0.30 | 0.88 | 0.55 | 0.00 | 0.22 | Anxiety, Shame, Contempt, Disgust, relief          | Anxiety, Shame               | Contempt, Disgust, relief                |
| 10     | NV CON | 0.66 | 0.00 | 0.14 | 0.33 | 0.33 | 0.55 | 0.86 | 0.00 | 0.00 | 0.00 | 0.76 | 0.84 | 0.40 | 0.33 | 0.00 | 0.00 | 0.14 | 0.25 | Joy, Amusement, Contempt, Pride, Boredom           | Joy, Amusement               | Contempt, Pride, Boredom                 |
| 11     | NV CON | 0.50 | 0.00 | 0.12 | 0.46 | 0.36 | 0.50 | 0.92 | 0.12 | 0.00 | 0.00 | 0.60 | 0.65 | 0.22 | 0.78 | 0.22 | 0.12 | 0.00 | 0.00 | Relief, Joy, Amusement, Contempt, Awe              | Relief, Joy, Amusement       | Contempt, Awe                            |
| 12     | NV CON | 0.13 | 0.00 | 0.31 | 0.13 | 0.23 | 0.53 | 0.83 | 0.13 | 0.23 | 0.13 | 0.62 | 0.93 | 0.31 | 0.13 | 0.31 | 0.13 | 0.00 | 0.23 | Joy, Contempt, Anxiety, Sadness, Amusement         | Joy                          | Contempt, Anxiety, Sadness, Amusement    |
| 13     | NV CON | 0.64 | 0.00 | 0.00 | 0.41 | 0.00 | 0.41 | 0.90 | 0.00 | 0.00 | 0.12 | 0.75 | 0.80 | 0.50 | 0.53 | 0.00 | 0.00 | 0.21 | 0.12 | Joy, Amusement, Relief, Awe, Contempt              | Joy, Amusement, Relief       | Awe, Contempt                            |
| 14     | NV DIS | 0.14 | 0.46 | 0.00 | 0.14 | 0.14 | 0.74 | 0.00 | 0.97 | 0.00 | 0.14 | 0.00 | 0.25 | 0.14 | 0.00 | 0.33 | 0.25 | 0.14 | 0.00 | Contempt, Anger, Sadness, Shame, Fear              | Contempt                     | Anger, Sadness, Shame, Fear              |
| 15     | NV DIS | 0.00 | 0.29 | 0.12 | 0.21 | 0.00 | 0.46 | 0.12 | 0.96 | 0.12 | 0.50 | 0.00 | 0.00 | 0.00 | 0.12 | 0.77 | 0.50 | 0.29 | 0.12 | Sadness, Shame, Fear, Contempt, Anger              | Sadness                      | Shame, Fear, Contempt, Anger             |
| 16     | NV EMB | 0.71 | 0.13 | 0.38 | 0.00 | 0.00 | 0.23 | 0.23 | 0.23 | 0.79 | 0.38 | 0.32 | 0.38 | 0.00 | 0.32 | 0.67 | 0.90 | 0.00 | 0.38 | Amusement, Sadness, Anxiety, Sympathy, Fear        | Amusement, Sadness           | Anxiety, Sympathy, Fear                  |
| 17     | NV EMB | 0.77 | 0.00 | 0.87 | 0.23 | 0.00 | 0.00 | 0.13 | 0.13 | 0.87 | 0.52 | 0.31 | 0.23 | 0.00 | 0.23 | 0.00 | 0.58 | 0.37 | 0.13 | Amusement, Shame, Fear, Surprise, Joy              | Amusement, Shame, Fear       | Surprise, Joy                            |
| 18     | NV EMB | 0.70 | 0.00 | 0.48 | 0.23 | 0.00 | 0.13 | 0.23 | 0.38 | 0.93 | 0.13 | 0.23 | 0.23 | 0.13 | 0.31 | 0.59 | 0.72 | 0.13 | 0.00 | Shame, Amusement, Sadness, Anxiety, Disgust        | Shame, Amusement             | Sadness, Anxiety, Disgust                |
| 19     | NV REL | 0    | 0    | 0.26 | 0.34 | 0.76 | 0.26 | 0.15 | 0.26 | 0.15 | 0    | 0.15 | 0.15 | 0    | 0.97 | 0.15 | 0    | 0.26 | 0.41 | Boredom, Sympathy, Awe, Anxiety, Contempt          | Boredom                      | Sympathy, Awe, Anxiety, Contempt         |
| 20     | NV REL | 0    | 0    | 0.66 | 0    | 0.46 | 0.12 | 0.12 | 0.22 | 0    | 0.12 | 0    | 0.36 | 0    | 0.98 | 0.22 | 0    | 0    | 0.12 | Anxiety, Boredom, Sadness, Disgust, Fear           | Anxiety                      | Boredom, Sadness, Disgust, Fear          |
| 21     | NV SAD | 0    | 0.11 | 0.28 | 0.11 | 0    | 0.11 | 0    | 0.11 | 0.21 | 0.4  | 0    | 0.61 | 0    | 0.21 | 0.97 | 0.52 | 0    | 0.49 | Shame, Sympathy, Fear, Anxiety, Embarrassment      | Shame                        | Sympathy, Fear, Anxiety, Embarrassment   |
| 22     | NV SAD | 0    | 0    | 0.54 | 0    | 0.13 | 0.24 | 0    | 0.63 | 0.39 | 0.54 | 0    | 0.39 | 0    | 0.24 | 0.95 | 0.5  | 0    | 0.65 | Sympathy, Disgust, Fear, Anxiety, Shame            | Sympathy                     | Disgust, Fear, Anxiety, Shame            |

| Item # | Type   | Amu  | Ang  | Anx  | Awe  | Bor  | Cmp  | Con  | Dis  | Emb  | Fea  | Joy  | Neu  | Pri  | Rel  | Sad  | Sha  | Sup  | Sym  | Selected Distractors                              | Partially correct distractor              | Incorrect distractor   |                                          |
|--------|--------|------|------|------|------|------|------|------|------|------|------|------|------|------|------|------|------|------|------|---------------------------------------------------|-------------------------------------------|------------------------|------------------------------------------|
| 23     | NV SHA | 0.14 | 0.14 | 0.25 | 0    | 0.14 | 0.4  | 0    | 0.33 | 0.83 | 0.33 | 0.14 | 0.25 | 0    | 0    | 0.76 | 0.93 | 0    | 0.14 | Embarrassment, Contempt, Fear                     | Sadness, Disgust, Fear                    | Embarrassment          | Sadness, Contempt, Disgust, Fear         |
| 24     | NV SHA | 0.14 | 0.14 | 0.33 | 0    | 0.5  | 0.45 | 0    | 0.24 | 0.5  | 0    | 0    | 0.58 | 0    | 0.14 | 0.93 | 0.81 | 0.14 | 0.45 | Embarrassment, Sympathy, Contempt, Anxiety        | Boredom, Fear, Disgust, Contempt          | Embarrassment          | Boredom, Sympathy, Contempt, Anxiety     |
| 25     | NV SHA | 0    | 0    | 0.11 | 0    | 0    | 0.11 | 0.11 | 0.11 | 0.68 | 0.28 | 0    | 0.11 | 0.11 | 0.11 | 0.92 | 0.92 | 0.11 | 0.2  | Embarrassment, Sympathy, Contempt                 | Fear, Disgust, Contempt                   | Embarrassment          | Fear, Sympathy, Disgust, Contempt        |
| 26     | NV SUP | 0.53 | 0    | 0.15 | 0.42 | 0.15 | 0.35 | 0.26 | 0    | 0    | 0    | 0.57 | 0.6  | 0    | 0.6  | 0    | 0    | 0.96 | 0    | Relief, Joy, amusement, Awe, Contempt             | Relief, Joy, amusement                    | Relief, Joy, amusement | Awe, Contempt                            |
| 27     | NV SUP | 0.28 | 0    | 0.21 | 0.81 | 0.21 | 0.28 | 0.28 | 0.11 | 0.11 | 0    | 0.21 | 0.67 | 0    | 0.85 | 0.11 | 0    | 0.88 | 0.11 | Relief, Contempt, Amusement, Boredom              | Content, Relief                           | Relief                 | Contempt, Amusement, Boredom, Content    |
| 28     | NV SYM | 0    | 0    | 0    | 0    | 0.52 | 0.52 | 0.34 | 0.2  | 0.48 | 0.2  | 0    | 0.7  | 0.2  | 0.44 | 0.78 | 0.4  | 0    | 0.91 | Sadness, Contempt, Embarrassment, Relief          | Boredom, Shame, Disgust, relief, Awe      | Sadness                | Boredom, Contempt, Embarrassment, Relief |
| 29     | NV SYM | 0    | 0    | 0    | 0    | 0.7  | 0.36 | 0.22 | 0.3  | 0.12 | 0    | 0.12 | 0.65 | 0    | 0.12 | 0.87 | 0.46 | 0    | 0.91 | Sadness, Boredom, Shame, Contempt, Disgust        | Shame, Boredom, contempt, relief, Awe     | Sadness                | Boredom, Shame, Contempt, Disgust        |
| 30     | NV SYM | 0.11 | 0    | 0.11 | 0.2  | 0.39 | 0.34 | 0    | 0    | 0    | 0.11 | 0.11 | 0.2  | 0    | 0.2  | 0.94 | 0.52 | 0    | 0.89 | Sadness, Anxiety, Fear, Relief, Shame             | Anger, Amusement, Embarrassment, Contempt | Shame                  | Boredom, contempt, relief, Awe           |
| 31     | NV SYM | 0    | 0.24 | 0.77 | 0.24 | 0.13 | 0    | 0.24 | 0    | 0.13 | 0.45 | 0    | 0.39 | 0    | 0.32 | 0.86 | 0.24 | 0.24 | 0.9  | Sadness, Anxiety, Fear, Relief, Shame             | Anger, Amusement, Embarrassment, Contempt | Sadness, Anxiety       | Fear, Relief, Shame                      |
| 32     | V AMU  | 0.83 | 0.12 | 0.22 | 0.22 | 0.36 | 0    | 0.66 | 0.12 | 0.12 | 0.12 | 0.88 | 0.82 | 0.29 | 0.12 | 0.12 | 0.22 | 0.12 | 0    | Content, Relief, Anxiety, Embarrassment, Fear     | Content                                   | Content                | Relief, Anxiety, Embarrassment, Fear     |
| 33     | V AMU  | 0.82 | 0    | 0    | 0.34 | 0.11 | 0    | 0.57 | 0    | 0    | 0    | 0.96 | 0.34 | 0.11 | 0.11 | 0    | 0    | 0.2  | 0.11 | Content, Relief, Anxiety, Embarrassment, Fear     | Content                                   | Content                | Relief, Anxiety, Embarrassment, Fear     |
| 34     | V ANG  | 0    | 0.9  | 0.34 | 0.28 | 0.2  | 0.79 | 0.28 | 0.51 | 0.2  | 0    | 0.2  | 0.71 | 0.51 | 0.44 | 0.11 | 0    | 0.2  | 0.44 | Disgust, Pride, Relief, Sympathy, Sadness         | Disgust                                   | Disgust                | Pride, Relief, Sympathy, Sadness         |
| 35     | V ANG  | 0.2  | 0.84 | 0.43 | 0.11 | 0.43 | 0.83 | 0.43 | 0.71 | 0.2  | 0.39 | 0.11 | 0.59 | 0.27 | 0.33 | 0.27 | 0    | 0.11 | 0.47 | Disgust, Anxiety, Boredom, Fear, Joy              | Disgust                                   | Disgust                | Anxiety, Boredom, Fear, Joy              |
| 36     | V BOR  | 0.12 | 0.12 | 0    | 0.21 | 0.96 | 0.21 | 0    | 0.28 | 0.21 | 0.21 | 0.12 | 0.75 | 0.21 | 0.12 | 0.67 | 0.28 | 0    | 0.12 | Sadness, Contempt, Relief, Anger, Amusement       | Sadness                                   | Sadness                | Contempt, Relief, Anger, Amusement       |
| 37     | V BOR  | 0.1  | 0.31 | 0    | 0    | 0.95 | 0.45 | 0.1  | 0.36 | 0.18 | 0.1  | 0.25 | 0.57 | 0    | 0.1  | 0.81 | 0.25 | 0    | 0.1  | Sadness, Shame, Joy, Embarrassment, Contempt      | Sadness                                   | Sadness                | Shame, Joy, Embarrassment, Contempt      |
| 38     | V CON  | 0.64 | 0    | 0.11 | 0.48 | 0.11 | 0.28 | 0.84 | 0    | 0.2  | 0.11 | 0.82 | 0.87 | 0.2  | 0.2  | 0.2  | 0.11 | 0.11 | 0.11 | Amusement, Contempt, Relief                       | Awe, Pride, Amusement                     | Amusement, Awe         | Contempt, Pride, Relief                  |
| 39     | V CON  | 0.21 | 0.12 | 0.21 | 0.29 | 0.36 | 0.46 | 0.81 | 0.12 | 0    | 0    | 0.62 | 0.93 | 0.41 | 0.29 | 0.29 | 0.12 | 0.12 | 0    | Joy, Boredom, Contempt, Pride, Sadness            | Joy                                       | Joy                    | Boredom, Contempt, Pride, Sadness        |
| 40     | V DIS  | 0.12 | 0.53 | 0.28 | 0    | 0.87 | 0.81 | 0.21 | 0.73 | 0.12 | 0.12 | 0.4  | 0.69 | 0.21 | 0.28 | 0.45 | 0.12 | 0    | 0.12 | Anger, Anxiety, Pride, Relief, Sadness            | Anger                                     | Anger                  | Anxiety, Pride, Relief, Sadness          |
| 41     | V DIS  | 0.2  | 0.44 | 0.11 | 0.2  | 0.62 | 0.75 | 0.6  | 0.57 | 0    | 0    | 0.11 | 0.93 | 0.11 | 0    | 0.2  | 0.11 | 0    | 0.44 | Boredom, Sympathy, Amusement                      | Sadness, Awe, Amusement                   | Boredom                | Sadness, Sympathy, Awe, Amusement        |
| 42     | V EMB  | 0.1  | 0    | 0.86 | 0.36 | 0.31 | 0    | 0.44 | 0    | 0.66 | 0.81 | 0.1  | 0.73 | 0.25 | 0.25 | 0.1  | 0.18 | 0.69 | 0.18 | Surprise, Content, Boredom, Awe, Shame            | Surprise                                  | Surprise               | Content, Boredom, Awe, Shame             |
| 43     | V EMB  | 0.89 | 0.11 | 0.67 | 0.34 | 0.11 | 0.11 | 0.34 | 0.11 | 0.64 | 0.39 | 0.77 | 0.27 | 0.11 | 0.48 | 0.34 | 0.11 | 0.51 | 0.11 | Relief, Surprise, Fear, Content, Awe              | Relief, Surprise                          | Relief, Surprise       | Fear, Content, Awe                       |
| 44     | V FEA  | 0.37 | 0    | 0.78 | 0    | 0.1  | 0    | 0.19 | 0.19 | 0.37 | 0.9  | 0.19 | 0.46 | 0.1  | 0.32 | 0.81 | 0.19 | 0.49 | 0.19 | Anxiety, Sadness, Surprise, Embarrassment, Relief | Anxiety, Sadness                          | Anxiety, Sadness       | Surprise, Embarrassment, Relief          |

| Item # | Type       | Amu  | Ang  | Anx  | Awe  | Bor  | Cmp  | Con  | Dis  | Emb  | Fea  | Joy  | Neu  | Pri  | Rel  | Sad  | Sha  | Sup  | Sym  | Selected Distractors                               | Partially correct distractor                           | Incorrect distractor                   |
|--------|------------|------|------|------|------|------|------|------|------|------|------|------|------|------|------|------|------|------|------|----------------------------------------------------|--------------------------------------------------------|----------------------------------------|
| 45     | V FEA      | 0.1  | 0.1  | 0.77 | 0.32 | 0.37 | 0.26 | 0.49 | 0.1  | 0.52 | 0.73 | 0.37 | 0.84 | 0.1  | 0.37 | 0.37 | 0.32 | 0.41 | 0.57 | Sympathy, Embarrassment, Sadness, Content, Boredom | Sympathy, Embarrassment                                | Sadness, Content, Boredom              |
| 46     | V SAD      | 0    | 0    | 0.6  | 0    | 0.28 | 0.11 | 0.11 | 0.2  | 0.34 | 0.71 | 0    | 0.68 | 0    | 0.34 | 0.93 | 0.34 | 0.2  | 0.64 | Fear, Anxiety, Sympathy, Disgust, Boredom          | Fear, Anxiety, Sympathy                                | Disgust, Boredom                       |
| 47     | V SAD      | 0    | 0    | 0.35 | 0.11 | 0.87 | 0.28 | 0.28 | 0    | 0.35 | 0.28 | 0    | 0.81 | 0    | 0.11 | 0.87 | 0.52 | 0.11 | 0.28 | Boredom, Shame, Sympathy, Anxiety, Content         | Boredom                                                | Shame, Sympathy, Anxiety, Content      |
| 48     | V SUP      | 0.65 | 0    | 0.19 | 0.46 | 0    | 0.19 | 0.5  | 0    | 0    | 0    | 0.85 | 0.38 | 0.38 | 0.56 | 0    | 0    | 0.91 | 0.19 | Joy, Relief, Anxiety, Pride, Anger                 | Joy, Relief                                            | Anxiety, Pride, Anger                  |
| 49     | V SUP      | 0.81 | 0.19 | 0.11 | 0.53 | 0    | 0.38 | 0.33 | 0.33 | 0    | 0.11 | 0.81 | 0.46 | 0.19 | 0.33 | 0    | 0    | 0.89 | 0.11 | Joy, Awe, Contempt, Content, Fear                  | Joy, Awe                                               | Contempt, Content, Fear                |
| 50     | V SYM      | 0.21 | 0.11 | 0.49 | 0.21 | 0.49 | 0.4  | 0.4  | 0.21 | 0.28 | 0.35 | 0.11 | 0.78 | 0    | 0.28 | 0.52 | 0.11 | 0.21 | 0.93 | Sadness, Anxiety, Boredom, Contempt, Content       | Sadness, Anxiety, Boredom                              | Contempt, Content                      |
| 51     | V SYM      | 0.11 | 0.11 | 0.34 | 0.4  | 0    | 0.34 | 0.52 | 0.11 | 0.28 | 0.4  | 0.55 | 0.79 | 0.28 | 0.64 | 0.2  | 0.2  | 0.68 | 0.85 | Surprise, Embarrassment, Disgust, Pride, Sadness   | Surprise                                               | Embarrassment, Disgust, Pride, Sadness |
| 52     | C ANGxCENT |      |      |      |      |      |      |      |      |      |      |      |      |      |      |      |      |      |      |                                                    |                                                        |                                        |
|        | Concealed  | 0.89 | 0.48 | 0    | 0.18 | 0.1  | 0.45 | 0.69 | 0.36 | 0.1  | 0.1  | 0.85 | 0.54 | 0.31 | 0.25 | 0.18 | 0    | 0.1  | 0.31 | Content, Disgust, Embarrassment, Sadness           | Wildcard + Content; Anger + Wildcard ; Content + Anger | All other answers                      |
|        | Displayed  | 0.45 | 0.93 | 0.18 | 0.00 | 0.36 | 0.69 | 0.18 | 0.57 | 0.18 | 0.31 | 0.61 | 0.25 | 0.18 | 0.36 | 0.54 | 0.10 | 0.10 | 0.00 | Anger, Disgust, Embarrassment, Sadness             |                                                        |                                        |
| 53     | C ANGxCENT |      |      |      |      |      |      |      |      |      |      |      |      |      |      |      |      |      |      |                                                    |                                                        |                                        |
|        | Concealed  | 0.25 | 0.25 | 0.1  | 0    | 0.69 | 0.36 | 0.76 | 0.25 | 0.1  | 0.1  | 0.48 | 0.81 | 0.1  | 0.78 | 0.51 | 0.31 | 0.18 | 0.63 | Content, Anxiety, Sympathy, Joy                    | Wildcard + Content; Anger + Wildcard ; Content + Anger | All other answers                      |
|        | Displayed  | 0.00 | 0.54 | 0.56 | 0.10 | 0.80 | 0.36 | 0.18 | 0.66 | 0.40 | 0.36 | 0.25 | 0.36 | 0.00 | 0.40 | 0.86 | 0.40 | 0.36 | 0.36 | Anger, Anxiety, Sympathy, Joy                      |                                                        |                                        |
| 54     | C ANGxCENT |      |      |      |      |      |      |      |      |      |      |      |      |      |      |      |      |      |      |                                                    |                                                        |                                        |
|        | Concealed  | 0.66 | 0.38 | 0.1  | 0.26 | 0.32 | 0.38 | 0.83 | 0.1  | 0.19 | 0    | 0.89 | 0.73 | 0.19 | 0.42 | 0.19 | 0    | 0    | 0.1  | Content, Amusement, Anxiety, Sadness               |                                                        |                                        |
|        | Displayed  | 0.64 | 0.91 | 0.58 | 0.10 | 0.32 | 0.38 | 0.00 | 0.32 | 0.19 | 0.32 | 0.56 | 0.42 | 0.00 | 0.32 | 0.68 | 0.42 | 0.26 | 0.10 | Anger, Amusement, Anxiety, Sadness                 |                                                        |                                        |
| 55     | C ANGxCENT |      |      |      |      |      |      |      |      |      |      |      |      |      |      |      |      |      |      |                                                    |                                                        |                                        |
|        | Concealed  | 0.43 | 0.29 | 0.24 | 0.09 | 0.59 | 0.39 | 0.87 | 0.24 | 0.09 | 0.09 | 0.76 | 0.73 | 0.39 | 0.72 | 0.09 | 0.17 | 0    | 0.09 | Content, Anxiety, Relief, Shame                    | Wildcard + Content; Anger + Wildcard ; Content + Anger | All other answers                      |
|        | Displayed  | 0.17 | 0.79 | 0.49 | 0.09 | 0.75 | 0.80 | 0.24 | 0.82 | 0.29 | 0.09 | 0.29 | 0.29 | 0.00 | 0.24 | 0.29 | 0.46 | 0.09 | 0.09 | Anger, Anxiety, Relief, Shame                      |                                                        |                                        |

| Item # | Type       | Amu  | Ang  | Anx  | Awe  | Bor  | Cmp  | Con  | Dis  | Emb  | Fea  | Joy  | Neu  | Pri  | Rel  | Sad  | Sha  | Sup  | Sym  | Selected Distractors                 | Partially correct distractor                                   | Incorrect distractor |
|--------|------------|------|------|------|------|------|------|------|------|------|------|------|------|------|------|------|------|------|------|--------------------------------------|----------------------------------------------------------------|----------------------|
| 56     | C ANGxCENT |      |      |      |      |      |      |      |      |      |      |      |      |      |      |      |      |      |      |                                      |                                                                |                      |
|        | Concealed  | 0.46 | 0.54 | 0.23 | 0    | 0.17 | 0.42 | 0.75 | 0.23 | 0    | 0    | 0.64 | 0.94 | 0.29 | 0.52 | 0.17 | 0    | 0    | 0    | Content, Relief, Disgust             | Sadness, Wildcard + Content; Anger + Wildcard; Content + Anger | All other answers    |
|        | Displayed  | 0.54 | 0.86 | 0.00 | 0.00 | 0.54 | 0.78 | 0.42 | 0.75 | 0.09 | 0.23 | 0.60 | 0.42 | 0.29 | 0.09 | 0.49 | 0.09 | 0.09 | 0.00 | Anger, Relief, Disgust               | Sadness,                                                       |                      |
| 57     | C CENTxANG |      |      |      |      |      |      |      |      |      |      |      |      |      |      |      |      |      |      |                                      |                                                                |                      |
|        | Concealed  | 0.69 | 0.76 | 0.09 | 0.16 | 0.09 | 0.6  | 0.58 | 0.55 | 0.37 | 0.09 | 0.84 | 0.69 | 0.28 | 0.16 | 0.23 | 0.23 | 0.16 | 0.23 | Anger, Embarrassment, Sadness        | Disgust, Wildcard + Content; Anger + Wildcard; Content + Anger | All other answers    |
|        | Displayed  | 0.70 | 0.92 | 0.09 | 0.28 | 0.00 | 0.77 | 0.16 | 0.69 | 0.23 | 0.16 | 0.65 | 0.16 | 0.09 | 0.09 | 0.00 | 0.09 | 0.00 | 0.00 | Content, Embarrassment, Sadness      | Disgust,                                                       |                      |
| 58     | C JOYxSAD  |      |      |      |      |      |      |      |      |      |      |      |      |      |      |      |      |      |      |                                      |                                                                |                      |
|        | Concealed  | 0.81 | 0.1  | 0    | 0.1  | 0.26 | 0.37 | 0.45 | 0.45 | 0.32 | 0.19 | 0.85 | 0.57 | 0.19 | 0.41 | 0.67 | 0.41 | 0.26 | 0.52 | Sadness, Sympathy, Shame, Awe        | Joy + Wildcard; Wildcard + Sadness; Sadness + Joy              | All other answers    |
|        | Displayed  | 0.70 | 0.10 | 0.26 | 0.00 | 0.10 | 0.26 | 0.10 | 0.55 | 0.52 | 0.26 | 0.55 | 0.32 | 0.10 | 0.41 | 0.93 | 0.57 | 0.10 | 0.10 | Joy, Sympathy, Shame, Awe            |                                                                |                      |
| 59     | C JOYxSAD  |      |      |      |      |      |      |      |      |      |      |      |      |      |      |      |      |      |      |                                      |                                                                |                      |
|        | Concealed  | 0.23 | 0.37 | 0.16 | 0    | 0.41 | 0.33 | 0.67 | 0.28 | 0.33 | 0.16 | 0.64 | 0.88 | 0.09 | 0.37 | 0.79 | 0.16 | 0.28 | 0.44 | Sadness, Anxiety, Fear, Shame        | Joy + Wildcard; Wildcard + Sadness; Sadness + Joy              | All other answers    |
|        | Displayed  | 0.78 | 0.41 | 0.48 | 0.16 | 0.33 | 0.28 | 0.28 | 0.33 | 0.00 | 0.55 | 0.84 | 0.33 | 0.23 | 0.28 | 0.78 | 0.50 | 0.23 | 0.16 | Joy, Anxiety, Fear, Shame            |                                                                |                      |
| 60     | C SADxJOY  |      |      |      |      |      |      |      |      |      |      |      |      |      |      |      |      |      |      |                                      |                                                                |                      |
|        | Concealed  | 0.68 | 0.24 | 0    | 0    | 0    | 0.17 | 0.72 | 0.17 | 0.24 | 0    | 0.95 | 0.39 | 0.24 | 0.43 | 0.09 | 0    | 0    | 0.55 | Joy, Disgust, Awe                    | Contempt, Sadness + Wildcard; Wildcard + Joy; Joy + Sadness    | All other answers    |
|        | Displayed  | 0.24 | 0.35 | 0.47 | 0.00 | 0.47 | 0.43 | 0.24 | 0.73 | 0.30 | 0.47 | 0.39 | 0.00 | 0.00 | 0.24 | 0.94 | 0.00 | 0.00 | 0.50 | Sadness, Disgust, Contempt, Awe      |                                                                |                      |
| 61     | C SADxJOY  |      |      |      |      |      |      |      |      |      |      |      |      |      |      |      |      |      |      |                                      |                                                                |                      |
|        | Concealed  | 0.79 | 0    | 0    | 0.1  | 0.1  | 0    | 0.64 | 0.1  | 0.1  | 0    | 0.96 | 0.25 | 0    | 0.36 | 0.1  | 0.1  | 0.31 | 0    | Joy, Embarrassment, Relief, Surprise | Sadness + Wildcard; Wildcard                                   | All other answers    |

| Item # | Type      | Amu  | Ang  | Anx  | Awe  | Bor  | Cmp  | Con  | Dis  | Emb  | Fea  | Joy  | Neu  | Pri  | Rel  | Sad  | Sha  | Sup  | Sym  | Selected Distractors                     | Partially correct distractor                      | Incorrect distractor |
|--------|-----------|------|------|------|------|------|------|------|------|------|------|------|------|------|------|------|------|------|------|------------------------------------------|---------------------------------------------------|----------------------|
| 62     | Displayed | 0.36 | 0.10 | 0.69 | 0.10 | 0.51 | 0.25 | 0.40 | 0.10 | 0.61 | 0.44 | 0.48 | 0.36 | 0.00 | 0.25 | 0.92 | 0.44 | 0.31 | 0.00 | Sadness, Embarrassment, Relief, Surprise | d + Joy;<br>Joy + Sadness                         |                      |
|        | C SADxJOY |      |      |      |      |      |      |      |      |      |      |      |      |      |      |      |      |      |      |                                          |                                                   |                      |
| 63     | Concealed | 0.8  | 0.11 | 0    | 0.27 | 0.33 | 0.27 | 0.68 | 0.27 | 0.2  | 0.2  | 0.91 | 0.63 | 0.2  | 0.33 | 0.33 | 0.11 | 0.38 | 0.11 | Joy, Anxiety, Fear, Relief               | Sadness + Wildcard; Wildcard + Joy; Joy + Sadness | All other answers    |
|        | C SADxJOY |      |      |      |      |      |      |      |      |      |      |      |      |      |      |      |      |      |      |                                          |                                                   |                      |
| 64     | Displayed | 0.33 | 0.20 | 0.67 | 0.00 | 0.83 | 0.38 | 0.33 | 0.27 | 0.43 | 0.53 | 0.61 | 0.38 | 0.00 | 0.27 | 0.78 | 0.50 | 0.47 | 0.20 | Sadness, Anxiety, Fear, Relief           |                                                   |                      |
|        | C SADxJOY |      |      |      |      |      |      |      |      |      |      |      |      |      |      |      |      |      |      |                                          |                                                   |                      |
| 64     | Concealed | 0.43 | 0.11 | 0.27 | 0.11 | 0.27 | 0.39 | 0.64 | 0.27 | 0.27 | 0.33 | 0.94 | 0.27 | 0    | 0.51 | 0.7  | 0.11 | 0.11 | 0.2  | Joy, Relief, Anxiety, Fear               | Sadness + Wildcard; Wildcard + Joy; Joy + Sadness | All other answers    |
|        | C SADxJOY |      |      |      |      |      |      |      |      |      |      |      |      |      |      |      |      |      |      |                                          |                                                   |                      |
| 64     | Displayed | 0.43 | 0.11 | 0.69 | 0.00 | 0.00 | 0.27 | 0.20 | 0.43 | 0.43 | 0.64 | 0.74 | 0.11 | 0.11 | 0.20 | 0.93 | 0.27 | 0.00 | 0.00 | Sadness, Relief, Anxiety, Fear           |                                                   |                      |
|        | C SADxJOY |      |      |      |      |      |      |      |      |      |      |      |      |      |      |      |      |      |      |                                          |                                                   |                      |
| 64     | Concealed | 0.65 | 0.1  | 0    | 0    | 0    | 0.26 | 0.81 | 0    | 0.32 | 0.1  | 0.91 | 0.72 | 0    | 0.45 | 0.45 | 0.32 | 0    | 0.1  | Joy, anxiety, Fear, Pride                | Sadness + Wildcard; Wildcard + Joy; Joy + Sadness | All other answers    |
|        | C SADxJOY |      |      |      |      |      |      |      |      |      |      |      |      |      |      |      |      |      |      |                                          |                                                   |                      |
| 64     | Displayed | 0.00 | 0.19 | 0.67 | 0.00 | 0.32 | 0.19 | 0.32 | 0.26 | 0.68 | 0.57 | 0.10 | 0.37 | 0.19 | 0.26 | 0.89 | 0.80 | 0.19 | 0.19 | Sadness, Anxiety, fear, pride            |                                                   |                      |

Note:

**Table S2 Study 2 Item-level Scoring and Confusions**

| Item # | Type   | Selected Distractors                               | Correct answer ( <i>pi</i> ) | Partially correct distractors ( <i>pi</i> ) | Incorrect distractors ( <i>pi</i> )                                          |
|--------|--------|----------------------------------------------------|------------------------------|---------------------------------------------|------------------------------------------------------------------------------|
| 1      | NV AMU | Joy, Content, Relief, Pride, Surprise              | Amusement (.91)              | Joy (.59)                                   | Content (.17) Relief (.08) Pride (.15) Surprise (.07)                        |
| 2      | NV AMU | Joy, Pride, Content, Contempt, Surprise            | Amusement (.89)              | Joy (.40)                                   | Pride (.32) Content (.31) Contempt (.18) Surprise (.21)                      |
| 3      | NV AMU | Joy, Content, Relief, Contempt, Awe                | Amusement (.89)              | Joy (.42)                                   | Content (.31) Relief (.25) Contempt (.23) Awe (.20)                          |
| 4      | NV AMU | Joy, Relief, Content, Surprise, Embarrassment      | Amusement (0.78)             | Joy (0.78)                                  | Joy (0.78) Relief (0.25) Content (0.21) Surprise (0.19) Embarrassment (0.07) |
| 5      | NV AMU | Joy, Content, Relief, Pride, Embarrassment         | Amusement (0.85)             | Joy (0.7)                                   | Content (0.19) Relief (0.08) Pride (0.27) Embarrassment (0.06)               |
| 6      | NV AMU | Joy, Relief, Content, Surprise, Fear               | Amusement (0.85)             | Joy (0.72)                                  | Relief (0.12) Content (0.22) Surprise (0.14) Fear (0.04)                     |
| 7      | NV BOR | Sadness, Disgust, Shame, Anxiety, Contempt         | Boredom (0.91)               | Sadness (0.35) Disgust (0.22)               | Shame (0.25) Anxiety (0.15) Contempt (0.33)                                  |
| 8      | NV BOR | Contempt, Embarrassment, Disgust, Anxiety, Content | Boredom (0.9)                | Contempt (0.33) Embarrassment (0.35)        | Disgust (0.21) Anxiety (0.25) Content (0.25)                                 |
| 9      | NV BOR | Anxiety, Shame, Contempt, Disgust, relief          | Boredom (0.82)               | Anxiety (0.5) Shame (0.48)                  | Contempt (0.25) Disgust (0.28) Relief (0.24)                                 |
| 10     | NV CON | Joy, Amusement, Contempt, Pride, Boredom           | Content (0.84)               | Joy (0.4) Amusement (0.39)                  | Contempt (0.22) Pride (0.46) Boredom (0.23)                                  |
| 11     | NV CON | Relief, Joy, Amusement, Contempt, Awe              | Content (0.81)               | Relief (0.59) Joy (0.42) Amusement (0.32)   | Contempt (0.23) Awe (0.17)                                                   |
| 12     | NV CON | Joy, Contempt, Anxiety, Sadness, Amusement         | Content (0.88)               | Joy (0.3)                                   | Contempt (0.31) Anxiety (0.33) Sadness (0.29) Amusement (0.29)               |
| 13     | NV CON | Joy, Amusement, Relief, Awe, Contempt              | Content (0.85)               | Joy (0.48) Amusement (0.32) Relief (0.35)   | Awe (0.22) Contempt (0.29)                                                   |

| Item # | Type   | Selected Distractors                                | Correct answer ( <i>pi</i> ) | Partially correct distractors ( <i>pi</i> ) | Incorrect distractors ( <i>pi</i> )                             |
|--------|--------|-----------------------------------------------------|------------------------------|---------------------------------------------|-----------------------------------------------------------------|
| 14     | NV DIS | Contempt, Anger, Sadness, Shame, Fear               | Disgust (0.93)               | Contempt (0.39)                             | Anger (0.29) Sadness (0.19) Shame (0.13) Fear (0.05)            |
| 15     | NV DIS | Sadness, Shame, Fear, Contempt, Anger               | Disgust (0.86)               | Sadness (0.58)                              | Shame (0.23) Fear (0.29) Contempt (0.21) Anger (0.19)           |
| 16     | NV EMB | Amusement, Sadness, Anxiety, Sympathy, Fear         | Embarrassment (0.88)         | Amusement (0.32) Sadness (0.37)             | Anxiety (0.35) Sympathy (0.29) Fear (0.14)                      |
| 17     | NV EMB | Amusement, Shame, Fear, Surprise, Joy               | Embarrassment (0.84)         | Amusement (0.48) Shame (0.33) Fear (0.37)   | Surprise (0.35) Joy (0.18)                                      |
| 18     | NV EMB | Shame, Amusement, Sadness, Anxiety, Disgust         | Embarrassment (0.86)         | Shame (0.42) Amusement (0.52)               | Sadness (0.14) Anxiety (0.25) Disgust (0.23)                    |
| 19     | NV REL | Boredom, Sympathy, Awe, Anxiety, Contempt           | Relief (0.94)                | Boredom (0.34)                              | Sympathy (0.1) Awe (0.2) Anxiety (0.2) Contempt (0.12)          |
| 20     | NV REL | Anxiety, Boredom, Sadness, Disgust, Fear            | Relief (0.96)                | Anxiety (0.24)                              | Boredom (0.22) Sadness (0.14) Disgust (0.1) Fear (0.08)         |
| 21     | NV SAD | Shame, Sympathy, Fear, Anxiety, Embarrassment       | Sadness (0.91)               | Shame (0.33)                                | Sympathy (0.36) Fear (0.12) Anxiety (0.22) Embarrassment (0.24) |
| 22     | NV SAD | Sympathy, Disgust, Fear, Anxiety, Shame             | Sadness (0.85)               | Sympathy (0.43)                             | Disgust (0.24) Fear (0.25) Anxiety (0.42) Shame (0.29)          |
| 23     | NV SHA | Embarrassment, Sadness, Contempt, Disgust, Fear     | Shame (0.85)                 | Embarrassment (0.67)                        | Sadness (0.38) Contempt (0.15) Disgust (0.13) Fear (0.07)       |
| 24     | NV SHA | Embarrassment, Boredom, Sympathy, Contempt, Anxiety | Shame (0.81)                 | Embarrassment (0.47)                        | Boredom (0.37) Sympathy (0.41) Contempt (0.29) Anxiety (0.32)   |
| 25     | NV SHA | Embarrassment, Fear, Sympathy, Disgust, Contempt    | Shame (0.87)                 | Embarrassment (0.56)                        | Fear (0.17) Sympathy (0.42) Disgust (0.14) Contempt (0.14)      |
| 26     | NV SUP | Relief, Joy, amusement, Awe, Contempt               | Surprise (0.89)              | Relief (0.38) Joy (0.24) Amusement (0.3)    | Awe (0.34) Contempt (0.19)                                      |
| 27     | NV SUP | Relief, Contempt, Content, Amusement, Boredom       | Surprise (0.88)              | Relief (0.6)                                | Contempt (0.14) Content (0.26) Amusement (0.13) Boredom (0.15)  |



| Item # | Type   | Selected Distractors                              | Correct answer ( <i>pi</i> ) | Partially correct distractors ( <i>pi</i> ) | Incorrect distractors ( <i>pi</i> )                               |
|--------|--------|---------------------------------------------------|------------------------------|---------------------------------------------|-------------------------------------------------------------------|
| 28     | NV SYM | Sadness, Boredom, Contempt, Embarrassment, Relief | Sympathy (0.87)              | Sadness (0.47)                              | Boredom (0.22) Contempt (0.31) Embarrassment (0.27) Relief (0.25) |
| 29     | NV SYM | Sadness, Boredom, Shame, Contempt, Disgust        | Sympathy (0.82)              | Sadness (0.6)                               | Boredom (0.39) Shame (0.32) Contempt (0.2) Disgust (0.14)         |
| 30     | NV SYM | Shame, Boredom, contempt, relief, Awe             | Sympathy (0.89)              | Shame (0.4)                                 | Boredom (0.39) Contempt (0.23) Relief (0.19) Awe (0.2)            |
| 31     | NV SYM | Sadness, Anxiety, Fear, Relief, Shame             | Sympathy (0.77)              | Sadness (0.6) Anxiety (0.55)                | Fear (0.29) Relief (0.19) Shame (0.2)                             |
| 32     | V AMU  | Content, Relief, Anxiety, Embarrassment, Fear     | Amusement (0.75)             | Content (0.72)                              | Relief (0.36) Anxiety (0.32) Embarrassment (0.24) Fear (0.12)     |
| 33     | V AMU  | Content, Relief, Anxiety, Embarrassment, Fear     | Amusement (0.88)             | Content (0.63)                              | Relief (0.29) Anxiety (0.13) Embarrassment (0.12) Fear (0.06)     |
| 34     | V ANG  | Disgust, Pride, Relief, Sympathy, Sadness         | Anger (0.85)                 | Disgust (0.46)                              | Pride (0.46) Relief (0.25) Sympathy (0.3) Sadness (0.07)          |
| 35     | V ANG  | Disgust, Anxiety, Boredom, Fear, Joy              | Anger (0.67)                 | Disgust (0.67)                              | Anxiety (0.48) Boredom (0.41) Fear (0.2) Joy (0.29)               |
| 36     | V BOR  | Sadness, Contempt, Relief, Anger, Amusement       | Boredom (0.87)               | Sadness (0.51)                              | Contempt (0.45) Relief (0.21) Anger (0.15) Amusement (0.1)        |
| 37     | V BOR  | Sadness, Shame, Joy, Embarrassment, Contempt      | Boredom (0.82)               | Sadness (0.65)                              | Shame (0.32) Joy (0.15) Embarrassment (0.16) Contempt (0.31)      |
| 38     | V CON  | Amusement, Awe, Contempt, Pride, Relief           | Content (0.82)               | Amusement (0.38) Awe (0.39)                 | Contempt (0.35) Pride (0.38) Relief (0.31)                        |
| 39     | V CON  | Joy, Boredom, Contempt, Pride, Sadness            | Content (0.84)               | Joy (0.26)                                  | Boredom (0.31) Contempt (0.46) Pride (0.48) Sadness (0.11)        |
| 40     | V DIS  | Anger, Anxiety, Pride, Relief, Sadness            | Disgust (0.76)               | Anger (0.5)                                 | Anxiety (0.28) Pride (0.33) Relief (0.43) Sadness (0.44)          |
| 41     | V DIS  | Boredom, Sadness, Sympathy, Awe, Amusement        | Disgust (0.68)               | Boredom (0.65)                              | Sadness (0.33) Sympathy (0.47) Awe (0.4) Amusement (0.23)         |
| 42     | V EMB  | Surprise, Content, Boredom, Awe, Shame            | Embarrassment (0.64)         | Surprise (0.7)                              | Content (0.44) Boredom (0.15) Awe (0.36) Shame (0.44)             |

| Item # | Type       | Selected Distractors                               | Correct answer ( <i>pi</i> )            | Partially correct distractors ( <i>pi</i> )                         | Incorrect distractors ( <i>pi</i> )                            |
|--------|------------|----------------------------------------------------|-----------------------------------------|---------------------------------------------------------------------|----------------------------------------------------------------|
| 43     | V EMB      | Relief, Surprise, Fear, Content, Awe               | Embarrassment (0.67)                    | Relief (0.27) Surprise (0.72)                                       | Fear (0.2) Content (0.36) Awe (0.45)                           |
| 44     | V FEA      | Anxiety, Sadness, Surprise, Embarrassment, Relief  | Fear (0.72)                             | Anxiety (0.58) Sadness (0.47)                                       | Surprise (0.45) Embarrassment (0.25) Relief (0.31)             |
| 45     | V FEA      | Sympathy, Embarrassment, Sadness, Content, Boredom | Fear (0.67)                             | Sympathy (0.45) Embarrassment (0.47)                                | Sadness (0.27) Content (0.66) Boredom (0.25)                   |
| 46     | V SAD      | Fear, Anxiety, Sympathy, Disgust, Boredom          | Sadness (0.82)                          | Fear (0.44) Anxiety (0.34) Sympathy (0.53)                          | Disgust (0.13) Boredom (0.3)                                   |
| 47     | V SAD      | Boredom, Shame, Sympathy, Anxiety, Content         | Sadness (0.72)                          | Boredom (0.64)                                                      | Shame (0.44) Sympathy (0.28) Anxiety (0.25) Content (0.37)     |
| 48     | V SUP      | Joy, Relief, Anxiety, Pride, Anger                 | Surprise (0.87)                         | Joy (0.59) Relief (0.26)                                            | Anxiety (0.26) Pride (0.25) Anger (0.05)                       |
| 49     | V SUP      | Joy, Awe, Contempt, Content, Fear                  | Surprise (0.83)                         | Joy (0.62) Awe (0.37)                                               | Contempt (0.17) Content (0.26) Fear (0.19)                     |
| 50     | V SYM      | Sadness, Anxiety, Boredom, Contempt, Content       | Sympathy (0.82)                         | Sadness (0.51) Anxiety (0.27) Boredom (0.3)                         | Contempt (0.32) Content (0.37)                                 |
| 51     | V SYM      | Surprise, Embarrassment, Disgust, Pride, Sadness   | Sympathy (0.82)                         | Surprise (0.55)                                                     | Embarrassment (0.31) Disgust (0.13) Pride (0.3) Sadness (0.44) |
| 52     | C ANGxCENT |                                                    | Concealed anger displayed content (.91) | Wildcard + Content or Anger + Wildcard (.48); Content + Anger (.42) | All other answers                                              |
|        | Concealed  | Content, Disgust, Embarrassment, Sadness           |                                         |                                                                     |                                                                |
|        | Displayed  | Anger, Disgust, Embarrassment, Sadness             |                                         |                                                                     |                                                                |
| 53     | C ANGxCENT |                                                    | Concealed anger                         | Wildcard + Content or Anger + Wildcard (.48); Content + Anger (.18) | All other answers                                              |

| Item # | Type      | Selected Distractors                   | Correct answer ( <i>pi</i> )            | Partially correct distractors ( <i>pi</i> )                         | Incorrect distractors ( <i>pi</i> ) |
|--------|-----------|----------------------------------------|-----------------------------------------|---------------------------------------------------------------------|-------------------------------------|
|        |           |                                        | displayed content (.72)                 |                                                                     |                                     |
| 54     | Concealed | Content, Anxiety, Joy, Sympathy        | Concealed anger displayed content (.84) | Wildcard + Content or Anger + Wildcard (.48); Content + Anger (.15) | All other answers                   |
|        | Displayed | Anger, Anxiety, Joy, Sympathy          |                                         |                                                                     |                                     |
| 55     | Concealed | Content, Amusement, Anxiety, Sadness   | Concealed anger displayed content (.83) | Wildcard + Content or Anger + Wildcard (.47); Content + Anger (.15) | All other answers                   |
|        | Displayed | Anger, Amusement, Anxiety, Sadness     |                                         |                                                                     |                                     |
| 56     | Concealed | Content, Anxiety, Relief, Shame        | Concealed anger displayed content (.86) | Wildcard + Content or Anger + Wildcard (.48); Content + Anger (.26) | All other answers                   |
|        | Displayed | Anger, Anxiety, Relief, Shame          |                                         |                                                                     |                                     |
| 57     | Concealed | Content, Relief, Sadness, Disgust      | Concealed content displayed anger (.54) | Content + wildcard or Wildcard+ Anger (.44); Anger + Content (.87)  | All other answers                   |
|        | Displayed | Anger, Relief, Sadness, Disgust        |                                         |                                                                     |                                     |
|        | Concealed | Anger, Disgust, Embarrassment, Sadness |                                         |                                                                     |                                     |

| Item # | Type      | Selected Distractors                     | Correct answer ( <i>pi</i> )          | Partially correct distractors ( <i>pi</i> )                     | Incorrect distractors ( <i>pi</i> ) |
|--------|-----------|------------------------------------------|---------------------------------------|-----------------------------------------------------------------|-------------------------------------|
| 58     | Displayed | Content, Disgust, Embarrassment, Sadness | Concealed joy displayed sadness (.58) | Joy + Wildcard or Wildcard +Sadness (.44); Sadness + Joy (.87)  | All other answers                   |
|        | C JOYxSAD |                                          |                                       |                                                                 |                                     |
| 59     | Concealed | Sadness, Sympathy, Shame, Awe            | Concealed joy displayed sadness (.78) | Joy + Wildcard or Wildcard +Sadness; Sadness (.46)+ Joy (.73)   | All other answers                   |
|        | Displayed | Joy, Sympathy, Shame, Awe                |                                       |                                                                 |                                     |
| 60     | C JOYxSAD |                                          | Concealed sadness displayed joy (.93) | Sadness + Wildcard or Wildcard + Joy (.47); Joy + Sadness (.25) | All other answers                   |
|        | Concealed | Sadness, Anxiety, Fear, Shame            |                                       |                                                                 |                                     |
| 61     | Displayed | Joy, Anxiety, Fear, Shame                | Concealed sadness displayed joy (.89) | Sadness + Wildcard or Wildcard + Joy (.48); Joy + Sadness (.15) | All other answers                   |
|        | C SADxJOY |                                          |                                       |                                                                 |                                     |
| 62     | Concealed | Joy, Disgust, Contempt, Awe              | Concealed sadness displayed joy (.85) | Sadness + Wildcard or Wildcard + Joy (.47); Joy + Sadness (.29) | All other answers                   |
|        | Displayed | Sadness, Disgust, Contempt, Awe          |                                       |                                                                 |                                     |
| 62     | C SADxJOY |                                          | Concealed sadness displayed joy (.85) | Sadness + Wildcard or Wildcard + Joy (.47); Joy + Sadness (.29) | All other answers                   |
|        | Concealed | Joy, Embarrassment, Relief, Surprise     |                                       |                                                                 |                                     |
| 62     | Displayed | Sadness, Embarrassment, Relief, Surprise |                                       |                                                                 |                                     |
|        | C SADxJOY |                                          |                                       |                                                                 |                                     |

| Item # | Type      | Selected Distractors           | Correct answer ( <i>pi</i> )          | Partially correct distractors ( <i>pi</i> )                     | Incorrect distractors ( <i>pi</i> ) |
|--------|-----------|--------------------------------|---------------------------------------|-----------------------------------------------------------------|-------------------------------------|
| 63     | Concealed | Joy, Anxiety, Fear, Relief     | Concealed sadness displayed joy (.92) | Sadness + Wildcard or Wildcard + Joy (.46); Joy + Sadness (.64) | All other answers                   |
|        | Displayed | Sadness, Anxiety, Fear, Relief |                                       |                                                                 |                                     |
| 64     | Concealed | Joy, Relief, Anxiety, Fear     | Concealed sadness displayed joy (.92) | Sadness + Wildcard or Wildcard + Joy (.47); Joy + Sadness (.29) | All other answers                   |
|        | Displayed | Sadness, Relief, Anxiety, Fear |                                       |                                                                 |                                     |
|        | Concealed | Joy, anxiety, Fear, Pride      |                                       |                                                                 |                                     |
|        | Displayed | Sadness, Anxiety, fear, pride  |                                       |                                                                 |                                     |

Note:

## Appendix

### Emotion Themes

**Instructions:** The table below contains 18 emotion words. Each emotion word has a theme which describes a 'script' associated with experience of that emotion. **Please read each emotion theme below:**

| Emotion       | Themes                                                                                   |
|---------------|------------------------------------------------------------------------------------------|
| Amusement     | Playful with others in the environment                                                   |
| Anger         | A demeaning offense against me and mine                                                  |
| Anxiety       | Facing an uncertain existential threat                                                   |
| Awe           | Feeling small relative to the environment/others; situation challenged worldview         |
| Boredom       | Low effort, low attention, and desire to shut out what is happening                      |
| Contempt      | Evaluating that others are unworthy; experiencing revulsion toward others                |
| Content       | Appreciation of present circumstance; feeling satisfied and secure                       |
| Disgust       | Taking in or being too close to an indigestible object or idea (metaphorically speaking) |
| Embarrassment | Being the target of an unexpected or accidental experience that is amusing to others     |
| Fear          | Facing an immediate and concrete physical danger                                         |
| Joy           | Improvement in resources; increased positive energy                                      |
| Neutral       | The lack of feeling any emotion                                                          |
| Pride         | Accomplishment; able to take on new challenges                                           |
| Relief        | A distressing goal-incongruent condition that has changed for the better                 |
| Sadness       | Having experienced an irrevocable loss                                                   |
| Shame         | Having failed to live up to an ego-ideal                                                 |
| Surprise      | Experiencing something unexpected; feeling stunned                                       |
| Sympathy      | Being moved by another's suffering and wanting to help                                   |

## **Autobiographical recall prompt Study 1**

“Begin by imagining the situation as vividly as you can; picture the events happening to you and see all the details of the situation. Please explain what events preceded the emotion and why you felt the emotion. Please only write examples of events that actually happened to you; we will later ask you to reenact the emotions from these events during the film shoot. We encourage you to write stories that are personally meaningful so this packet will not be collected (i.e. only you will see the stories you write here).”

## **Method Acting Prompt Study 1**

“I want you to go back to the time you felt a slight/medium amount of [emotion]. Imagining the situation as vividly as you can; picture the events happening to you and see all the details of the situation. When you are ready, please show me [emotion].”

## **Materials- MET Instructions**

### **Nonverbal and Verbal items**

“On the following pages you will see short video clips of people expressing a variety of emotions. Please watch each video clip carefully (they are very short) and then answer the questions.”

The text for the response prompt was as follows:

“What emotion did the person express?”

### **Concealed emotion items**

The concealed emotion stimuli were presented in separate trials with unique instructions. Furthermore, the concealed emotions included different instructions that explained the unique nature of the task to participants. The instructions were as follows:

“On the following pages you will see 13 short video clips of people expressing a variety of emotions. Each person will try to hide one emotion by expressing a different emotion. Please watch each video clip carefully (they are very short) and then fill in the blanks in the following sentence:

“I think the person tried to hide \_\_\_\_\_ by expressing \_\_\_\_\_.”

For each concealed emotion item, participants were allowed to select one label for the emotion they believed was expressed, and one label for the emotion they believe was concealed.
